# Supplementary material for: Norms for a Pictographic System: The Aragonese Portal of Augmentative/Alternative Communication (ARASAAC) System
Source: Front Psychol. 2018 Dec 14;9:2538. doi: 10.3389/fpsyg.2018.02538 (PMC6305113; doi:10.3389/fpsyg.2018.02538)
Supplement: TABLE S1 — Normative data for 295 ARASAAC pictures. [file Table_1.xlsx]

## Sheet: Hoja1
MODAL NAME	ENGLISH MODAL NAME	NAME IN ARASAAC	ENGLISH NAME IN ARASAAC	COINCIDENCE	PICTURE	NAME AGREEMENT	H INDEX	CONCEPTUAL FAMILIARITY	IMAGE AGREEMENT	VISUAL COMPLEXITY	TOT	RT	PHONEMES	AOA	HELLINGER AFFINITY
ABAJO	DOWN	haber	to have	NO	haber	0.461538	2.03014	1.9	3.36364	1.91176	0	1093.64	5		0.804171
ACANTILADO	CLIFF	cabo	cape	NO	cabo	0.236842	3.17425	4.23	3.87879	2.55882	1	1347.88	10		0.686374
ACCIDENTE	ACCIDENT	encuentro	meeting	NO	encuentro	0.487179	1.50812	3.73	4.41176	3	0	1306.5	9	3.6	0.94682
ADIVINAR	GUESS	nombre	first name	NO	nombre	0.138889	3.22162	2.1	3.125	2.5	1	1541	8		0.456339
ADMINISTRACIÓN	ADMINISTRATION	administración	administration	YES	administración	0.243243	3.43516	3.87	3.73529	2.97059	1	1299.83	14		0.728737
AGUA	WATER	agua	water	YES	agua_1	0.923077	0.461882	4.53	3.85294	1.63636	0	930.87	4	1.22	0.862796
ALBAÑIL	BUILDER	construcción	building	NO	construcción_1	0.297297	2.50487	3.62	4.52941	2.84848	1	1271.64	7		0.83555
ÁLBUM	ALBUM	álbum	album	YES	álbum	0.666667	1.74049	4.33	4.36364	2.23529	1	1057.07	5	3.6	0.822551
AMANECER	DAWN	mañana	morning	NO	mañana	0.538462	2.13541	3.03	3.75758	2.32353	1	1202	8	3.24	0.725388
AMIGOS	FRIENDS	relación	relationship	NO	relación	0.512821	1.90649	2.31	4.24242	2.20588	0	1041	6		0.794445
AMIGOS	FRIENDS	campaña	campaign	NO	campaña	0.0810811	2.78644	4.14	3.63636	3.15152	1	1032.5	6		0.540241
AMOR	LOVE	palabra	word	NO	palabra	0.564103	2.02789	2.5	2.21875	1.44118	1	918.476	4	3.48	0.812677
AMOR	LOVE	amor	love	YES	amor_2	0.351351	2.43948	4.64	4	2.38235	0	926	4	3.48	0.804751
ARAGÓN	ARAGON	comunidad	community	NO	comunidad_1	0.235294	2.54675	3.03	4.21212	2.36364	11	1202	6		0.543378
ARRUGAS	WRINKLES	frente	forehead	NO	frente	0.447368	2.31399	3.83	4.47059	1.63636	1	942.75	6		0.829821
ARTE	ART	cultura	culture	NO	cultura	0.117647	2.76248	3.38	3.33333	2.91176	2	1502.75	4	4.2	0.448029
ATARDECER	SUNSET	tarde	afternoon	NO	tarde	0.305556	2.45983	3.57	3.97059	2.17647	0	1166	9	3.92	0.702277
BALANCÍN	ROCKER	movimiento	movement	NO	movimiento	0.411765	1.71688	2.97	4.18182	2.36364	9	1466.5	8		0.791055
BALANZA	BALANCE	justicia	justice	NO	justicia	0.473684	2.34512	3.43	4.60606	2.17647	0	945.308	7	3.03	0.869386
BALANZA	BALANCE	pesar	to weigh	NO	pesar	0.447368	2.34675	2.89	4.33333	2.18182	1	1276.56	7	3.03	0.8938
BALONMANO	HANDBALL	jugador	player	NO	jugador_1	0.263158	2.74113	3.72	4.15152	3	0	1418.33	9		0.834472
BANCO	BANK	banco	bank	YES	banco_2	1	0	4.27	4.29412	1.58824	0	754.7	5	2.22	0.915335
BEBER	TO DRINK	tomar	drink	NO	tomar_3	0.794872	0.927848	4.43	4.38235	2.02941	0	871.828	5	1.56	0.919182
BIEN	ALL RIGHT	bien	all right	YES	bien	0.333333	2.76677	4.4	4.17647	1.38235	3	869	4	1.68	0.68643
BIEN	ALL RIGHT	éxito	success	NO	éxito	0.210526	3.17947	3.03	3.73529	1.85294	0	963.571	4	1.68	0.659677
BODA	WEDDING	acto	act	NO	acto_3	0.526316	1.76129	4.07	4.54545	2.58824	1	833.84	4		0.894419
CABEZA	HEAD	cabeza	head	YES	cabeza	0.447368	2.27418	2.47	4.0625	1.78788	1	1087.6	6	1.92	0.805699
CALENDARIO	CALENDAR	septiembre	September	NO	Septiembre	0.514286	2.24548	4.53	4.33333	2.45455	0	894.111	10	2.91	0.776488
CALENDARIO	CALENDAR	marzo	March	NO	Marzo	0.421053	2.23716	4.67	4.61765	2.44118	1	922	10	2.91	0.870261
CALENDARIO	CALENDAR	junio	June	NO	Junio	0.4	2.58108	4.73	4.30303	2.5625	2	915	10	2.91	0.814138
CALENDARIO	CALENDAR	febrero	February	NO	Febrero	0.394737	2.24233	4.7	4.47059	2.55882	0	848.375	10	2.91	0.844858
CALENDARIO	CALENDAR	mayo	May	NO	Mayo	0.358974	2.44215	4.41	4.61765	2.44118	1	914.167	10	2.91	0.924446
CALENDARIO	CALENDAR	noviembre	November	NO	Noviembre	0.358974	1.99429	4.43	4.5	2.73529	1	1090.92	10	2.91	0.950253
CALENDARIO	CALENDAR	diciembre	December	NO	Diciembre	0.333333	2.66799	4.17	4.52941	2.5	0	967.312	10	2.91	0.911051
CALENDARIO	CALENDAR	julio	July	NO	Julio	0.333333	2.6053	4.43	4.63636	2.4375	0	922.625	10	2.91	0.802092
CALENDARIO	CALENDAR	agosto	August	NO	Agosto	0.324324	2.6111	4.33	4.59375	2.64706	1	995.6	10	2.91	0.876971
CALENDARIO	CALENDAR	enero	January	NO	Enero	0.324324	2.97147	4.53	4.76471	2.5	1	941.125	10	2.91	0.800432
CALENDARIO	CALENDAR	abril	April	NO	Abril	0.315789	2.58476	4.5	4.55882	2.55882	0	963	10	2.91	0.819696
CALLE	STREET	calle	street	YES	calle	0.820513	0.842187	4.55	4.38235	3.70588	1	1035.95	4	2.28	0.880159
CÁMARA	CAMERA	cámara	camera	YES	cámara_2	0.897436	0.630917	4.13	4.85294	2.08824	0	862.926	6	3.56	0.850256
CAMBIO	CHANGE	vuelta	return	NO	vuelta	0.432432	2.76717	4.43	4.06061	2.78788	0	1056.62	6		0.723339
CAMBIO	CHANGE	cambio	change	YES	cambio_1	0.421053	2.81618	4.33	3.78788	2.5	0	1242.67	6		0.737632
CAMINAR	WALK	paso	step	NO	paso	0.358974	2.3875	3.5	4.35294	2.20588	0	978.444	7		0.75458
CAMINAR	WALK	acceso	access	NO	acceso	0.342105	2.56672	3.57	4.35294	2.29412	1	1106.6	7		0.674786
CAMINO	PATH	camino	path	YES	camino	0.769231	1.11894	4.23	4.70588	2.44118	0	1042.82	6	2.32	0.863701
CAMPO	COUNTRY	campo	country	YES	campo_1	0.641026	1.8596	4.14	4.61765	2.88235	0	1005.56	5	2.92	0.812923
CARA	FACE	cara	face	YES	cara	0.846154	0.965787	3.97	4.55882	1.52941	0	886.722	4	1.8	0.830307
CARRERA	RACE	carrera	race	YES	carrera	0.435897	2.62407	3.87	4.29412	2.91176	1	894.111	6		0.890549
CARRETERA	HIGHWAY	principio	beginning	NO	principio	0.416667	2.34915	2.6	3.94118	1.97059	1	1077.67	8		0.779527
CARRETERA	HIGHWAY	final	end	NO	final	0.358974	2.64295	2.52	3.5	1.91176	0	1078.55	8		0.587264
CARRETERA	HIGHWAY	fin	end	NO	fin	0.282051	2.94396	2.53	3.42424	1.78788	0	882	8		0.605741
CARTA	LETTER	carta	letter	YES	carta_1	0.769231	1.0619	3.57	3.75758	2.35294	0	1455.88	5	2.54	0.723288
CASA	HOME	casa	home	YES	casa	0.948718	0.3431	4.63	4.61765	1.52941	0	735.32	4	1.43	0.947121
CASA	HOME	día	day	NO	día	0.447368	2.34295	4.57	4.52941	1.55882	2	862.778	4	1.43	0.776162
CASA	HOME	vivir	to live	NO	vivir_1	0.25641	2.36151	4.27	3.79412	2.14706	1	893.333	4	1.43	0.723559
CASA	HOME	llegar	to arrive	NO	llegar_2	0.205128	3.30848	3.57	4.17647	2	0	858.273	4	1.43	0.75411
CASTILLO	CASTLE	palacio	palace	NO	palacio	0.871795	0.552495	3.48	4.47059	3.41176	0	919.267	7	2.31	0.985789
CHICO	BOY	joven	young	NO	joven_2	0.236842	2.59165	3.67	4.11765	2.0303	0	1462	4	2.12	0.699398
CINE	CINEMA	cine	cinema	YES	cine_1	0.538462	1.98366	4.38	4.67647	2.66667	0	1211.82	4	2.96	0.849284
CÍRCULOS	CIRCLES	conjunto	set	NO	conjunto	0.297297	2.93966	1.53	3.76471	1.97059	0	985.4	8		0.641467
CIUDAD	CITY	ciudad	city	YES	ciudad	0.74359	0.941536	4.27	4.67647	3.54545	0	899.722	6	2.55	0.761331
CIUDAD	CITY	localidad	town	NO	localidad	0.717949	1.2788	4.29	4.69697	3.33333	0	998.7	6	2.55	0.902977
CLASE	CLASS	clase	class	YES	clase_8	0.236842	3.25337	4.23	3.85294	2.66667	3	1088.17	5	2.48	0.55526
COLEGIO	SCHOOL	entrada	entry	NO	entrada_2	0.589744	2.08189	4.28	4	3.33333	0	1168	7		0.81136
COLEGIO	SCHOOL	escuela	school	NO	escuela_1	0.131579	3.16012	2.79	2.44118	2.14706	2	2126	7		0.469526
COLORES	COLORS	color	color	YES	color	0.578947	1.79196	3	4.11765	1.73529	0	836.571	7		0.769434
COLORES	COLORS	selección	selection	NO	selección	0.105263	3.07735	1.87	3.42424	2.64706	2	1099.33	7		0.363678
CONGRESO	CONGRESS	congreso	congress	YES	congreso	0.641026	1.7728	3.4	4.11765	3.30303	1	1401.81	8	6.12	0.900197
COPA	CUP	copa	cup	YES	copa	0.948718	0.3431	4.13	4.21212	1.33333	0	886.621	4	2.96	0.947121
CORAZÓN	HEART	corazón	heart	YES	corazón	0.974359	0.172037	4.1	3.5	2.05882	0	854.118	7		0.987096
CORRECTO	RIGHT	vez	time	NO	vez	0.410256	2.35563	3.53	4.64706	1.58824	0	1127.33	7		0.781185
CORRER	RUN	seguir	to follow	NO	seguir_2	0.538462	2.13069	3.77	4.55882	2.5	0	846.4	5	2.32	0.886987
CRECER	GROW	crecimiento	increase	NO	crecimiento	0.605263	1.86528	3.37	3.94118	2.39394	1	1603.91	6	2.08	0.761382
CRECER	GROW	desarrollo	development	NO	desarrollo	0.358974	2.43726	3.59	4.06061	2.64706	0	1423.56	6	2.08	0.823835
CRISIS*	CRISIS	crisis	crisis	YES	crisis	0.105263	3.81375	3.57	3.32353	3	2		6	4.76	0.608801
CRUZ	CROSS	lugar	place	NO	lugar	0.333333	2.92534	1.53	3.58824	2	1	992.818	4		0.706416
CRUZ	CROSS	sitio	site	NO	sitio	0.289474	3.10819	1.7	3.32353	2.0303	0	1103.33	4		0.706119
CRUZ	CROSS	centro	center	NO	centro_1	0.236842	2.63292	2.17	3.45455	2.32353	0	1169.5	4		0.657279
CUARTO	QUARTER	parte	part	NO	parte	0.368421	2.81912	2.2	3.41176	1.88235	3	1288.43	6	2.92	0.633729
CUARTO	QUARTER	cuarto	quarter	YES	cuarto_4	0.324324	3.07398	3.4	3.48485	1.61765	2	1666.75	6	2.92	0.624237
CUARTO	QUARTER	mantener	keep	NO	mantener	0.236842	2.88149	2.2	2.81818	2.02941	1	1781.75	6	2.92	0.815469
CUERPO	BODY	cuerpo	body	YES	cuerpo_4	0.282051	3.17364	3.17	4.70588	1.70588	1	1136.89	6	2.44	0.754989
CUERPO	BODY	humano	human	NO	humano	0.282051	3.12914	3.21	4.67647	1.87879	0	1092.54	6	2.44	0.647325
CUMPLEAÑOS	BIRTHDAY	edad	age	NO	edad	0.820513	0.785152	4.03	4.11765	2	1	894.292	10		0.959821
DADO	DICE	dado	dice	YES	dado	0.948718	0.3431	4.07	4.94118	1.87879	0		4	2.77	0.95752
DAR	TO GIVE	dar	to give	YES	dar_1	0.228571	3.28622	3.21	4.27273	2.11765	1	1595	3	2.36	0.705003
DINERO	MONEY	economía	economy	NO	economía	0.923077	0.377641	4.8	4.61765	2.71875	0	920.939	6	2.19	0.973329
DINERO	MONEY	dinero	money	YES	dinero	0.894737	0.643355	4.87	4.81818	2.3871	0	982.118	6	2.19	0.959715
DIPUTADO	DEPUTY	ministro	minister	NO	ministro	0.388889	2.90138	3	3.87879	3.21212	0	1628.67	8		0.625157
DIPUTADOS	MEMBERS	gobierno	government	NO	gobierno_1	0.289474	3.05578	3.43	4.54545	3.30303	1	855.5	9		0.656303
DIRECTOR	DIRECTOR	director	director	YES	director	0.742857	1.65892	4.03	4.51515	2.79412	1	1182.91	8	3.83	0.904776
DIRECTOR	DIRECTOR	cargo	position	NO	cargo	0.564103	2.13508	3.87	4.27273	2.94118	0	1169.39	8	3.83	0.68669
DISCO	DISK	disco	disk	YES	disco_1	0.589744	1.30127	4.13	4.14706	1.88235	1	866.769	5	3.19	0.853099
DIVISIÓN	DIVISION	división	division	YES	división	0.74359	1.00639	3.9	4.14706	1.64706	0	1107.6	8		0.873912
DIVISIÓN	DIVISION	razón	ratio	NO	razón	0.717949	1.23115	3.97	3.9697	2.11765	0	1109.71	8		0.867757
DOMINGO	SUNDAY	domingo	Sunday	YES	Domingo	0.631579	1.77307	4.53	3.88235	2.17647	2	1055.56	7		0.843384
DOS	TWO	victoria	victory	NO	victoria	0.368421	2.40138	4.03	3.36364	1.5	2	1190.62	3		0.891837
E	E	energía	energy	NO	energía	0.179487	2.58538	1.57	3.41176	2.27273	1	1121	1		0.725185
EJÉRCITO	ARMY	ejército	army	YES	ejército	0.552632	1.86619	3.5	4.58824	3.09091	0	984.174	8	4.2	0.882126
ENTRAR	GET IN	entrar	to get in	YES	entrar_2	0.666667	1.45008	4.03	4.26471	2.38235	0	1097.92	6	2.32	0.775392
EQUIPO	TEAM	equipo	team	YES	equipo_2	0.74359	1.18857	3.63	4.35294	3.20588	2	945.174	5	2.84	0.85066
ESCRITORIO	DESK	mesa	table	NO	mesa_1	0.815789	1.15371	4.66	4.76471	2.63636	0	960.611	10	3.48	0.861447
ESPAÑA	SPAIN	país	country	NO	país_6	0.540541	1.23535	4.5	4.23529	1.67647	1	828.583	6		0.949154
ESPAÑOL	SPANISH	español	Spanish	YES	español	0.578947	1.86438	3.93	4.26471	2.05882	0	1233.88	7		0.81273
ESPEJO	MIRROR	nivel	level	NO	nivel	0.0540541	1.94978	1.27	3.28125	3.17647	1	1367	6	2.15	0.398194
ESPIRAL	SPIRAL	origen	origin	NO	origen	0.621622	1.27114	1.6	4.40625	2.41176	3	956.923	7		0.719407
ESPIRAL	SPIRAL	causa	cause	NO	causa	0.5	1.6178	1.73	4.17647	2.26471	2	1097.44	7		0.802203
ESTACIONES	SEASONS	año	year	NO	año	0.621622	1.55401	4.17	4.47059	2.0303	0	1641.15	10		0.881029
ESTATUA	STATUE	figura	figure	NO	figura_1	0.820513	0.776269	3.23	4.20588	2.75758	4	1078.15	7		0.924591
ESTRELLAS	STARS	cielo	sky	NO	cielo_1	0.763158	1.22473	4.3	4.67647	2.55882	0	1024.48	8		0.943877
ESTUDIAR	STUDY	estudio	study	NO	estudio	0.769231	1.25446	4.53	4.84848	2.05882	0	996.452	8	3.28	0.92991
ESTUDIAR	STUDY	trabajo	job	NO	trabajo_1	0.162162	3.55777	4.27	4.26471	2.75758	1	1046.57	8	3.28	0.728448
FÁBRICA	FACTORY	empresa	company	NO	empresa_1	0.815789	0.870691	3.4	4.85294	2.27273	0	1117.21	7		0.779154
FÁBRICA	FACTORY	industria	industry	NO	industria_1	0.794872	1.0204	3.57	4.64706	1.9697	0	1003.24	7		0.825154
FAMILIA	FAMILY	familia	family	YES	familia_6	0.923077	0.513164	4.24	4.63636	2.60606	0	993.429	7		0.943932
FAMILIA	FAMILY	seguridad	security	NO	seguridad	0.243243	1.62567	2.55	3.91176	3.32353	1	1140.91	7		0.771976
FAMILIA	FAMILY	protección	protection	NO	protección	0.184211	2.4685	2.59	3.85294	3.05882	1	1232.58	7		0.562186
FECHA	DATE	fecha	date	YES	fecha	0.675676	1.31368	3.38	4.20588	2.90625	0	1635.76	4		0.793543
FEMENINO	FEMALE	mujer	woman	NO	mujer_5	0.384615	2.10502	4.4	4.08824	1.44118	3	1198.3	8		0.829296
FIGURAS	FIGURES	serie	sequence	NO	serie_3	0.512821	2.14025	2.37	3.38235	2.5	1	1304.9	7		0.703601
FOLIOS	SHEET	papel	paper	NO	papel	0.666667	1.74152	4.1	4.67647	1.73529	0	1100.68	6		0.923025
FOTO	PHOTO	marco	frame	NO	marco	0.421053	2.15624	4.47	4.36364	2.20588	0	828.905	4	2.26	0.817587
FUEGO	FIRE	fuego	fire	YES	fuego	0.897436	0.6822	3.97	4.82353	2.03125	0	831.548	5	2.06	0.9569
FUENTE	SOURCE	fuente	source	YES	fuente_1	1	0	4.23	4.44118	2.45455	0	914.182	6	2.51	0.972598
FUERTE	STRONG	fuerza	strength	NO	fuerza	0.384615	2.41246	3.9	4.75758	2.23529	1	954.217	6	2.68	0.744658
FUERTE	STRONG	fuerte	strong	YES	fuerte_2	0.25641	3.02924	3.63	4.58824	2.14706	0	817.333	6	2.68	0.783283
FÚTBOL	FOOTBALL	fútbol	football	YES	fútbol_1	0.717949	1.7314	3.59	4.70588	2.91176	0	816.542	6	2.48	0.872918
GENTE	PEOPLE	grupo	group	NO	grupo	0.210526	2.81855	3.6	4.44118	3.15152	3	1082.2	5	2.6	0.758835
GENTE	PEOPLE	personal	personal	NO	personal	0.205128	2.89931	3.69	4.12121	3.23529	0	1038	5	2.6	0.779258
GIRAR	TURN	volver	return	NO	volver	0.538462	2.20605	3.2	4	2.42424	0	1122.86	5	2.68	0.732069
GRUPO	GROUP	banda	band	NO	banda_1	0.315789	2.37423	2.07	3.29412	3.52941	1	973.6	5	2.86	0.677559
GRUPO	GROUP	sociedad	society	NO	sociedad	0.297297	2.51823	4.13	4.21212	3.05882	4	904	5	2.86	0.72779
GRUPO	GROUP	gente	people	NO	gente	0.216216	2.91994	3.43	4.11765	3.0303	0	1169.6	5	2.86	0.805342
GRUPO	GROUP	organización	organization	NO	organización	0.189189	2.49097	2	3.9697	3.23529	0	1424.5	5	2.86	0.378509
GRUPO	GROUP	asociación	association	NO	asociación	0.162162	3.0049	3.67	3.91176	3.27273	0	997.5	5	2.86	0.316216
GUERRA	WAR	guerra	war	YES	guerra	0.641026	1.58856	3.24	4.20588	3.29412	2	1356.67	4	3.58	0.865528
HABLAR	TO TALK	hablar	to talk	YES	hablar	0.564103	2.04509	4.5	4.5	2.11765	0	930.815	5	1.56	0.931917
HERIDA	WOUND	sangre	blood	NO	sangre	0.473684	1.93563	3.3	4.26471	2.14706	2	983.708	5		0.950765
HIJA	DAUGHTER	hija	daughter	YES	hija	0.512821	1.428	3.3	4.38235	2.51515	0	1044.64	3		0.841358
HIJO	SON	hermano	brother	NO	hermano	0.512821	1.70955	3.6	4.33333	2.35294	0	1124.78	3	2.4	0.850446
HIJO	SON	hijo	son	YES	hijo_1	0.461538	2.15519	3.43	4.29412	2.32353	0	1160.33	3	2.4	0.853998
HIJO	SON	amigo	friend	NO	amigo_1	0.394737	2.34481	3.27	3.6	2.26471	0	1324.7	3	2.4	0.825435
HOMBRE	MAN	hombre	man	YES	hombre_1	0.692308	1.61523	3.9	4.64706	2.20588	0	1128.53	5	2.17	0.743586
HOMBRE	MAN	persona	person	NO	persona_5	0.657895	1.60685	3.9	4.42424	1.93939	0	1180.75	5	2.17	0.824282
HUELLA	FINGERPRINT	investigación	investigation	NO	investigación	0.461538	2.29652	3.41	3.69697	2.57576	2	1010.86	5		0.847825
IDEA	IDEA	luz	light	NO	luz_2	0.435897	1.64971	3.93	4.47059	1.64706	1	1149.2	4	3.2	0.909629
IGLESIA	CHURCH	iglesia	church	YES	iglesia	1	0	3.77	4.51515	3	0	897.645	7		0.956183
INFORMACIÓN	INFORMATION	información	information	YES	información_4	0.769231	0.917496	3.37	3.32353	1.52941	1	1165.43	11		0.877566
INSTITUTO	HIGH SCHOOL	instituto	high school	YES	instituto	0.842105	0.932138	4.23	4.33333	3.08824	0	1244.52	9	4.85	0.92528
ISLA	ISLAND	isla	island	YES	isla_1	0.846154	0.914505	3.87	4.87879	2.76471	0	999.323	4	2.39	0.929085
IZQUIERDA	LEFT	izquierda	left	YES	izquierda	0.289474	2.45068	3.9	4.08824	1.78788	0	1236.67	8	2.48	0.910248
JUEGO	GAME	producción	production	NO	producción	0.184211	2.74032	2.27	3.18182	3.17647	4	821.5	5	1.73	0.476668
JUEGO	GAME	crear	to create	NO	crear	0.135135	3.0027	1.7	2.55882	3.29412	3	854	5	1.73	0.532487
JUEGOS	GAMES	juego	game	NO	juego	0.710526	0.98058	3.86	4.15152	3.94118	1	1244.33	6		0.872954
JUEZ	JUDGE	tribunal	court	NO	tribunal	0.74359	1.44857	3.5	4.73529	2.6875	1	1157.77	4	3.83	0.86568
JUGAR	TO PLAY	evitar	to avoid	NO	evitar	0.361111	2.76062	3.14	4	2.5	2	995.125	5	1.68	0.792163
JUGAR	TO PLAY	pasar	to happen	NO	pasar	0.358974	2.31171	3.76	4.06061	2.23529	0	1053.17	5	1.68	0.85028
JUICIO	JUDGMENT	juicio	judgment	YES	juicio_1	0.25641	3.36721	3.48	4.38235	3.26471	2	1241.62	6	5.48	0.837909
LANZAR	TO THROW	llevar	to carry	NO	llevar	0.222222	3.31634	2.97	3.70588	2.09091	1	1192.33	6	2.68	0.7114
LENGUA	TONGUE	lengua	tongue	YES	lengua_1	0.974359	0.172037	4	4.73529	1.88235	0	817.462	6	1.79	0.957182
LEÓN	LION	león	Lion	YES	león_2	0.974359	0.172037	3.77	4.61765	2.23529	0	645.211	4	2.12	0.982122
LETRA	LETTER	carácter	character	NO	carácter_1	0.641026	1.28155	4.3	4.58824	1.32353	0	938.5	5	2.56	0.909007
LEY	LAW	ley	law	YES	ley	0.368421	2.18123	2.3	3.45455	2.11765	3	1116.12	3	4.21	0.621078
LIBERTAD	FREEDOM	libertad	freedom	YES	libertad	0.394737	3.08443	3.13	2.88235	2.5	1	1865.5	8	4.12	0.606406
LIBRO	BOOK	libro	book	YES	libro_1	0.921053	0.556428	4.6	4.58824	1.61765	0	861.241	5	1.99	0.932411
LIBRO	BOOK	materia	matter	NO	materia_4	0.538462	2.42478	3.8	3.87879	2.44118	2	1241.11	5	1.99	0.707608
LIMPIADORES	CLEANING STAFF	servicio	cleaning staff	NO	servicio_3	0.641026	1.75448	3.97	4.3125	2.47059	0	1061	11		0.834346
LÍNEA	LINE	línea	line	YES	línea	0.736842	1.40278	2.23	4.29412	1.70588	0	822.5	5	2.16	0.813656
LISTA	LIST	lista	list	YES	lista_2	0.512821	1.90786	4.36	4.32353	2.51515	1	1405.67	5	3.44	0.750471
LUZ	LIGHT	claro	clear	NO	claro_1	0.512821	2.04239	3.9	4.11765	1.67647	0	760.222	3	2	0.862796
MADRE	MOTHER	tía	aunt	NO	tía_7	0.710526	1.4484	4	4.14706	2.57576	0	1095.35	5	1.56	0.775567
MADRE	MOTHER	madre	mother	YES	madre	0.473684	2.42356	3.2	4.67647	1.91176	1	1083.44	5	1.56	0.704708
MAL	WRONG	mal	wrong	YES	mal	0.461538	2.62824	4.1	3.61765	1.44118	0	1307.81	3	1.96	0.787894
MANCHA	STAIN	negro	black	NO	negro	0.820513	1.06092	2.2	3.88235	1.76471	1	943.269	5		0.931867
MANCHA	STAIN	blanco	white	NO	blanco	0.540541	2.12753	2.63	3.39394	2	2	1162.36	5		0.821473
MANO	HAND	mano	hand	YES	mano	0.974359	0.172037	4.4	4.91176	1.76471	0	833.484	4	1.42	0.960047
MANOS	HANDS	ayuda	help	NO	ayuda	0.184211	3.57685	3.6	4.09091	2.02941	2	887	5		0.637516
MANOS	HANDS	apoyo	support	NO	apoyo	0.179487	3.79149	3.53	4.18182	2	1	1034.33	5		0.59925
MARCHITAR	WITHER	muerto	dead	NO	muerto	0.157895	3.6264	3.45	4.35294	2.02941	1	1333.88	8		0.637764
MATERIAL	MATERIAL	educación	education	NO	educación	0.157895	3.54348	4.4	3.75758	2.60606	1	655	8		0.530471
MATERIAL	MATERIAL	formación	training	NO	formación_1	0.135135	3.46859	4.46	3.79412	2.73529	2	1375	8		0.414695
MEDALLA	MEDAL	premio	prize	NO	premio	0.615385	1.71298	3.66	4.52941	2.05882	0	853.312	6	3.12	0.876748
MÉDICO	DOCTOR	salud	health	NO	salud_1	0.358974	3.16672	4.2	4.26471	2.41176	1	1280.17	6	2.48	0.715187
MENOR	LESS	menor	less	YES	menor_1	0.351351	2.92693	2.5	2.78788	1.70588	2	1465.8	5	2.88	0.69051
MILITAR	MILITARY	militar	military	YES	militar_1	0.394737	1.90092	3.47	4.61765	2.5	0	1094.85	7		0.950395
MIRAR	LOOK	duda	doubt	NO	duda	0.342105	2.58732	2.76	3.20588	2.5	4	1288.46	5	2.24	0.62008
MITAD	HALF	mitad	half	YES	mitad	0.487179	2.51421	2.1	3.85294	1.97059	1	1224	5	2.96	0.689318
MITAD	HALF	media	half	NO	media	0.447368	2.70213	1.9	4	2.14706	0	1161.25	5	2.96	0.616588
MITAD	HALF	medio	medium	NO	medio	0.394737	1.85776	2.03	3.97059	2.09091	1	1274.2	5	2.96	0.741608
MUERTE	DEATH	muerte	death	YES	muerte	0.282051	3.19412	3.3	2.69697	2.76471	4	1890.4	6	3.2	0.681277
MUNDO	WORLD	tierra	Earth	NO	Tierra_1	0.435897	1.74463	3.87	4.82353	2.15152	0	814.286	5	2.68	0.88068
MUNDO	WORLD	ambiente	ambient	NO	ambiente_1	0.236842	2.84542	4.52	4.61765	2.44118	2	728	5	2.68	0.835522
MÚSICA	MUSIC	canción	song	NO	canción_1	0.538462	1.89533	4.17	4.5	2.44118	0	874.654	6	2.16	0.900294
MÚSICA	MUSIC	música	music	YES	música_3	0.512821	2.02982	3.9	4.5	2.52941	0	862.579	6	2.16	0.887982
NATURALEZA	NATURE	naturaleza	nature	YES	naturaleza	0.631579	1.72043	3.7	4.1875	3.24242	0	1516	10		0.764354
NIETO	GRANDCHILD	vida	lifetime	NO	vida	0.27027	3.30728	3.74	4.5	2.33333	1	1520	5	3.04	0.6349
NIÑO	BOY	niño	boy	YES	niño_3	0.871795	0.798896	4.13	4.64706	1.85294	0	1005.17	4	1.44	0.944994
NOCHE	NIGHT	noche	night	YES	noche	0.868421	0.689509	4.3	4.24242	1.70588	0	1168.92	4	2.16	0.896342
NORTE	NORTH	norte	north	YES	Norte	0.815789	1.08122	3.52	4.58824	1.5	1	886.4	5	3.92	0.925124
OBJETOS	OBJECTS	objeto	object	NO	objeto	0.358974	1.89942	3.17	3.47059	2.02941	2	1516	7		0.500666
OBRA	WORK	obra	work	YES	obra_2	0.567568	2.17694	3.34	3.58824	2.87879	1	1164.25	4	4.2	0.727278
OESTE	WEST	oeste	West	YES	Oeste	0.897436	0.6822	3.37	4.66667	1.69697	0	1128.14	5	3.6	0.865012
OJO	EYE	vista	vision	NO	vista	0.948718	0.3431	4.53	4.76471	1.97059	0	743.265	3	1.43	0.960398
ORIENTADOR	COUNSELOR	sala	room	NO	sala_1	0.461538	2.86632	3.63	4.14706	3.27273	2	1258.61	10		0.802813
ORO	GOLD	oro	gold	YES	oro	0.717949	1.53885	3.4	4.58824	1.82353	0	1218.7	3	3.52	0.791663
OTOÑO	AUTUMN	octubre	October	NO	Octubre	0.342105	2.13623	4.67	3.02941	2.52941	0	1296.75	5	2.5	0.888214
PADRE	FATHER	tío	uncle	NO	tío_3	0.736842	1.29489	3.77	4.47059	2.41176	0	1178.43	5	1.38	0.833886
PADRE	FATHER	padre	father	YES	padre	0.342105	2.60962	3.34	4.38235	2.02941	3	1235	5	1.38	0.827215
PAGAR	TO PAY	dejar	to leave	NO	dejar_1	0.108108	2.64468	3.21	2.93548	3.36364	6	1494	5	2.96	0.356642
PARTIDO	MATCH	partido	match	YES	partido_1	0.487179	1.86899	3.9	4	3.02941	0	984	7		0.823104
PARTIDO	MATCH	resultado	result	NO	resultado_2	0.289474	2.29352	3.21	2.91176	2.58824	2	1456.86	7		0.800997
PAZ	PEACE	paz	peace	YES	paz	0.641026	1.25167	4	4.55882	1.61765	0	1039.79	3	2.92	0.96382
PELIGRO	DANGER	atención	attention	NO	atención_1	0.289474	2.80552	4.2	4.02941	1.47059	4	979	7		0.759156
PELOTA	BALL	conseguir	to get	NO	conseguir	0.324324	2.75761	2.9	4.17647	2.08824	3	1146.16	6	1.52	0.676494
PELOTA	BALL	tener	to have	NO	tener	0.27027	2.82972	2.47	3.41176	1.97059	0	1284.4	6	1.52	0.568999
PELOTA	BALL	uso	to use	NO	uso	0.257143	3.15984	2.13	3.8125	2.36364	1	1016.8	6	1.52	0.575623
PELOTA	BALL	poder	power	NO	poder	0.205128	3.634	1.93	4.11765	2.17647	0	816.6	6	1.52	0.701973
PENSAR	TO THINK	pensar	think	YES	pensar	0.717949	1.40076	2	4.23529	1.58824	1	1045.87	6	2.88	0.82275
PENSAR	TO THINK	verdad	true	NO	verdad	0.243243	2.72747	3.23	3.51515	2.61765	3	1127	6	2.88	0.564963
PENSAR	TO THINK	problema	problem	NO	problema	0.166667	3.50217	3.6	3.90909	2.18182	4	1172.2	6	2.88	0.698669
PENSAR	TO THINK	encontrar	to find	NO	encontrar_3	0.114286	2.11624	3.55	3.30303	2.60606	3	1227.75	6	2.88	0.273607
PERIÓDICO	NEWSPAPER	diario	daily	NO	diario	0.842105	0.859641	3.9	4.75758	1.64706	0	756.481	9		0.930454
PERIÓDICO	NEWSPAPER	prensa	press	NO	prensa	0.410256	1.8993	3.93	4.32353	2.06061	0	798.368	9		0.818158
PERSONA*	PERSON	honor	honor	NO	honor	0.157895	2.50852	2.57	3.96875	1.81818	0	1075.88	7		0.732963
PERSONAS	PEOPLE	participación	participation	NO	participación	0.108108	2.62331	2.31	3.71875	2.47059	3	1836.75	8		0.450625
PIE	FOOT	pie	foot	YES	pie_1	0.974359	0.172037	4.5	4.70588	1.5	0	772.581	3	1.43	0.97329
PINTAR	PAINT	actividad	activity	NO	actividad	0.216216	3.01525	3.14	3.75	3.30303	0	913.333	6	2.4	0.477526
PISO	FLOOR	bajo	ground floor	NO	bajo_1	0.236842	3.19122	3.45	4.35294	2.51515	1	1020.5	4		0.683491
PLANETAS	PLANETS	espacio	space	NO	espacio	0.282051	2.68237	3.17	4	3.11765	2	1084.22	8		0.767177
PLASTILINA	CLAY	hacer	to do	NO	hacer	0.289474	3.07279	2.13	4.21212	2.41176	0	1373.2	10		0.624556
PLATO	PLATE	poner	to place	NO	poner_3	0.487179	2.50949	4.1	4.51515	2.64706	0	998.429	5		0.805253
PLAYA	BEACH	costa	coast	NO	costa	0.921053	0.523588	4.57	4.72727	2.79412	0	964.667	5	2.2	0.958417
PLAYA	BEACH	mar	sea	NO	mar	0.447368	1.8245	4.41	4.20588	2.71875	0	930	5	2.2	0.917396
PLAZA	SQUARE	plaza	square	YES	plaza	0.589744	1.45293	3.57	4.35294	3.14706	1	1339.62	5	2.56	0.888512
POLICÍA	POLICE	policía	police	YES	policía_3	0.923077	0.513164	4.1	4.69697	2.64706	0	789.067	7		0.90735
PRECIO	PRICE	precio	price	YES	precio_1	0.710526	1.55367	4.17	4.44118	2.33333	1	1105.78	6	2.94	0.813162
PRECIO	PRICE	valor	value	NO	valor	0.692308	1.73715	4.2	4.75758	2	0	1009.25	6	2.94	0.75966
PREGUNTA	QUESTION	cuestión	question	NO	cuestión	0.472222	2.72961	3.41	4.41176	1.73529	0	1020.31	8		0.66205
PREGUNTA	QUESTION	pregunta	question	YES	pregunta	0.333333	2.80714	3.7	4.52941	1.85294	0	833.857	8		0.835125
PREGUNTA	QUESTION	saber	to know	NO	saber_2	0.27027	2.8602	4.27	3.55882	2.08824	2	961.4	8		0.796025
PRESIDENTA	CHAIRWOMAN	política	politics	NO	política	0.289474	3.19366	3.63	4.3125	2.94118	1	1338.17	10		0.703994
PRESIDENTE	PRESIDENT	presidente	President	YES	presidente	0.621622	2.23535	3.8	4.29412	2.5	1	1183	10		0.710378
PRESIDENTE	PRESIDENT	político	politician	NO	político	0.394737	2.96874	4.34	4.47059	2.94118	2	1326.5	10		0.786727
PROFESIONES	PROFESSIONS	empleo	job	NO	empleo_2	0.243243	3.32802	3.97	4.41176	2.85294	1		11		0.601853
PROFESOR	TEACHER	comunicación	communication	NO	comunicación_1	0.166667	3.67342	4.33	4.08824	3.32353	0	933	8	2.2	0.581637
PROGRAMA	PROGRAM	programa	program	YES	programa_2	0.236842	2.84895	4.14	3.90909	2.94118	2	993.333	8	3.84	0.83364
PÚBLICO	PUBLIC	público	public	YES	público	0.216216	3.04474	3.53	4.32353	3.14706	4	1543	7		0.607767
PUEBLO	TOWN	municipio	municipality	NO	municipio	0.974359	0.172037	4.3	4.66667	3.05882	0	998.4	6	2.12	0.85485
PUEBLO	TOWN	pueblo	town	YES	pueblo	0.948718	0.3431	4.17	4.61765	3.23529	0	958.48	6	2.12	0.927587
PUEBLO	TOWN	población	population	NO	población_1	0.923077	0.513164	4.07	4.55882	3.25	0	1071.25	6	2.12	0.794636
PUERTA	DOOR	puerta	door	YES	puerta	0.974359	0.172037	4.4	4.70588	1.26471	0	752.25	6	1.88	0.987096
PUERTO	PORT	puerto	port	YES	puerto_1	0.421053	2.84667	3.68	4.52941	3.58824	1	1600.2	6	3.28	0.606639
PUNTO	POINT	punto	point	YES	punto	0.513514	1.86	2.23	4.58824	1.26471	0	1001.06	5	3	0.889598
RADIO	RADIO	radio	radio	YES	radio	0.945946	0.216633	3.57	4	2.32353	0	880.833	5	2.15	0.884974
RED	NET	red	net	YES	red_1	0.512821	1.99117	2.34	4.18182	3.72727	1	1297.67	3	3.54	0.694845
REGLA	RULE	medida	measure	NO	medida_2	0.810811	1.06873	3.13	4.52941	1.94118	0	952.769	5	2.96	0.879293
RELOJ	CLOCK	presente	present	NO	presente_1	0.410256	2.26514	2.97	4.02941	2.02941	2	720.167	5	2.18	0.75015
RELOJ	CLOCK	futuro	future	NO	futuro_1	0.333333	2.8123	3.07	4.08824	2	0	788.111	5	2.18	0.732425
RELOJ	CLOCK	pasado	past	NO	pasado_1	0.243243	3.34695	3	3.79412	2.06061	0	777.182	5	2.18	0.727068
REUNIÓN	MEETING	reunión	meeting	YES	reunión_1	0.589744	2.25765	4.43	4.79412	2.90625	0	1209.78	7		0.741437
RÍO	RIVER	río	river	YES	río	0.897436	0.495394	4.23	4.47059	2.88235	1	1057.74	3	2.16	0.931865
RÍO	RIVER	canal	channel	NO	canal	0.820513	0.789872	4.23	4.17647	2.44118	2	1252.23	3	2.16	0.882141
ROJO	RED	decisión	decision	NO	decisión	0.114286	3.61053	1.79	3.90909	2.88235	0		4	2.08	0.410488
ROMPER	TO BREAK	partir	to split	NO	partir	0.871795	0.714655	3.52	4.08824	2.52941	1	1059.28	6	2.25	0.93671
ROTACIÓN	ROTATION	mundial	worldwide	NO	mundial	0.216216	2.90031	3.73	4.20588	2.25	2	1226.5	8		0.767192
SALIR	TO GET OUT	salir	to get out	YES	salir_2	0.74359	1.41665	4	4.26471	2.29412	0	787.1	5	2.52	0.861879
SALUDAR	TO GREET	conocer	to meet	NO	conocer	0.594595	1.97655	4.21	4.625	2.41176	0	1120.54	7		0.783831
SANGRE	BLOOD	análisis	analysis	NO	análisis_5	0.194444	3.28152	3.83	3.70588	3.23529	3	1164.91	6	2.21	0.703206
SECRETARIO	SECRETARY	secretario	secretary	YES	secretario	0.552632	2.27434	3.93	4.41176	2.9375	0	1387.61	10	4.24	0.757317
SEMANA	WEEK	semana	week	YES	semana_1	0.789474	1.1307	4.29	4.57576	2.72727	1	1409.39	6	2.35	0.926257
SEÑAL	SIGNAL	dirección	address	NO	dirección_1	0.305556	2.42347	3.73	3.91176	1.73529	0	1017.8	5	3.4	0.836346
SILUETA	SILHOUETTE	señor	mister	NO	señor	0.236842	2.8848	2.69	4.06061	1.67647	0	1340.33	7	3.76	0.673848
SOL	SUN	sol	sun	YES	Sol	0.948718	0.3431	4.57	4.82353	1.73529	0	658.654	3	1.6	0.918316
SUELO	FLOOR	suelo	floor	YES	suelo	0.567568	2.20789	2.4	4.24242	3.29412	1	1417.2	5	2.17	0.638633
SUMA	SUM	cuenta	account	NO	cuenta_5	0.710526	1.23788	4.38	4.66667	1.70588	0	982.519	4	2.64	0.952624
SUPERMERCADO	SUPERMARKET	mercado	market	NO	mercado	0.769231	1.40831	4.6	4.51515	3.125	0	890.409	12		0.89996
SUR	SOUTH	sur	south	YES	Sur	0.789474	1.19631	3.6	4.17647	1.55882	0	1057.09	3	3.36	0.879248
TEATRO	THEATER	teatro	theater	YES	teatro_1	0.684211	1.64355	3.37	4.42424	3.20588	1	1100.57	6	3.72	0.881827
TEATRO	THEATER	función	show	NO	función_2	0.421053	1.60726	3.79	3.23529	2.29412	5	1376.67	6	3.72	0.855992
TEATRO	THEATER	película	movie	NO	película	0.27027	2.88477	3.63	3.27273	3.12121	1	1316.88	6	3.72	0.75321
TELEVISIÓN	TV	televisión	TV	YES	televisión	0.74359	1.28112	4.47	4.58824	1.55882	0	823.3	10		0.868323
TIEMPO	WEATHER	tiempo	weather	YES	tiempo_1	0.777778	1.29879	2.9	3.16129	2.64706	2	988.087	6	2.66	0.797724
TIEMPO	WEATHER	hora	hour	NO	hora	0.157895	3.2777	4.6	3.06061	2.08824	3	1175.5	6	2.66	0.651306
TIENDA	STORE	puesto	Market Stall	NO	puesto_1	0.842105	0.98477	3.9	4.44118	1.64706	1	943.593	6	2.62	0.882805
TIENDA	STORE	comercio	commerce	NO	comercio_2	0.820513	0.996033	4.17	3.97059	1.82353	1	970.115	6	2.62	0.863635
TIERRA	EARTH	mundo	world	NO	mundo_1	0.461538	1.59639	4.33	4.09091	2.29412	0	909.667	5	2.56	0.884194
TRABAJO	JOB	trabajar	to work	NO	trabajar_1	0.210526	3.63945	4.14	3.94118	2.64706	1	1493	7		0.540846
TRANSPORTES	TRANSPORTATION	transporte	transport	NO	transporte	0.342857	2.58541	3.97	4.23529	2.32353	2	1454.18	11		0.818038
TRES	THREE	cantidad	quantity	NO	cantidad	0.162162	2.51667	1.77	2.82353	2.05882	0	1318.67	4		0.653842
UNIVERSIDAD	COLLEGE	universidad	college	YES	universidad	0.948718	0.3431	4.67	3.61765	2.47059	0	936.107	11		0.944044
VER	TO SEE	ver	see	YES	ver_3	0.263158	2.65356	4.53	3.5	2.44118	3	832.667	3	1.92	0.570945
VIAJAR	TO TRAVEL	viaje	travel	NO	viaje	0.153846	3.18512	2.79	3.88235	2.73529	3	1117.2	6	3.04	0.720178
VÍAS	ROUTES	vía	via	NO	vía	0.307692	2.4435	3.27	4.61765	1.91176	1	924.5	4		0.703884
VIENTO	WIND	aire	air	NO	aire_1	0.789474	1.2688	4.45	3.52941	2.90909	1	1251	6	2.4	0.731146
VIRGEN	VIRGIN	santa	saint	NO	santa	0.447368	2.39946	3.3	4.26471	2.23529	0	1084.33	6	3.64	0.79345
